# Supplementary material for: A diagnostic classifier for pediatric chronic graft-versus-host disease: results of the ABLE/PBMTC 1202 study
Source: PubMed Central journal article supplement — Blood Adv. 2022 Oct 14;7(14):3612–23. doi: 10.1182/bloodadvances.2022007715 (PMC10365946; doi:10.1182/bloodadvances.2022007715), 2022-10-14
Supplement: BLOODA_ADV-2022-007715-mmc1.pdf [file BLOODA_ADV-2022-007715-mmc1.pdf]

**A Diagnostic Classifier for Pediatric Chronic Graft-Versus-Host Disease: Results of the ABLE /  
PBMTC 1202 Study**

**SUPPLEMENTARY DATA FILES**

Geoffrey D.E. Cuvelier, MD; Bernard Ng, PhD; Sayeh Abdossamadi, PhD; Eneida R. Nemecek, MD, MS; Alexis Melton, MD; Carrie L. Kitko, MD; Victor A. Lewis, MD; Tal Schechter, MD; David A. Jacobsohn, MD; Andrew C. Harris, MD; Michael A. Pulsipher, MD; Henrique Bittencourt, MD, PhD; Sung Won Choi, MD; Emi H. Caywood, MD; Kimberly A. Kasow, DO; Monica Bhatia, MD; Benjamin R. Oshrine, MD; Sonali Chaudhury, MD; Donald Coulter, MD; Joseph H. Chewning, MD; Michael Joyce, MD, PhD; Süreyya Savaşan, MD; Anna B. Pawlowska, MD; Gail C. Megason, MD; David Mitchell, MD; Alexandra C. Cheerva, MD; Anita Lawitschka, MD; Elena Ostroumov, PhD; and Kirk R. Schultz, MD.

**Supplementary Table 1.** Baseline characteristics. ALL, Acute Lymphoblastic Leukemia; AML, Acute Myelogenous Leukemia; HLA, Human Leukocyte Antigen; MDS, Myelodysplastic Syndrome

| <b>Characteristic</b>             | <b>Chronic GVHD Group</b> | <b>Control Group</b> |
|-----------------------------------|---------------------------|----------------------|
|                                   | <b>(N=44)</b>             | <b>(N=190)</b>       |
| <b>Age at HCT, years (median)</b> | 12.0                      | 8.9                  |
| <b>(range)</b>                    | (2.0 – 18)                | (0.2 – 18.1)         |
| <b>Sex</b>                        |                           |                      |
| <b>Male</b>                       | 28 (64%)                  | 101 (53%)            |
| <b>Female</b>                     | 16 (36%)                  | 89 (47%)             |
| <b>Indication for Transplant</b>  |                           |                      |
| <b>Malignant (n=161, 69%)</b>     | N=35 (80%)                | N=126 (66%)          |
| ALL                               | 14                        | 56                   |
| MDS/AML                           | 14                        | 57                   |
| Other                             | 7                         | 13                   |
| <b>Non-Malignant (n=73, 31%)</b>  | N=9 (20%)                 | N=64 (34%)           |
| Inherited Marrow Failure          | 2                         | 8                    |
| Primary Immune Deficiency         | 1                         | 15                   |
| Severe Aplastic Anemia            | 2                         | 13                   |
| Sickle Cell Anemia                | 3                         | 16                   |
| Thalassemia                       | 0                         | 5                    |
| Metabolic                         | 1                         | 7                    |
| <b>Graft Source</b>               |                           |                      |
| Bone Marrow                       | 22 (50%)                  | 126 (66%)            |
| Peripheral Blood Stem Cells       | 16 (36%)                  | 32 (17%)             |
| Umbilical Cord                    | 6 (14%)                   | 32 (17%)             |
| <b>Type of Donor / HLA Match</b>  |                           |                      |
| Matched Sibling                   | 8 (18%)                   | 66 (35%)             |
| Matched-Related Non-Sibling       | 0 (0%)                    | 6 (3%)               |
| Matched Unrelated                 | 19 (43%)                  | 80 (42%)             |
| Mismatched Unrelated              | 16 (36%)                  | 34 (18%)             |
| Haploidentical Family Member      | 1 (2%)                    | 4 (2%)               |
| <b>Conditioning Regimen</b>       |                           |                      |
| Myeloablative                     | 39 (89%)                  | 164 (86%)            |
| Reduced Intensity                 | 5 (11%)                   | 26 (14%)             |

|                                                                                                                                    | Chronic GVHD Group | Control Group |
|------------------------------------------------------------------------------------------------------------------------------------|--------------------|---------------|
| <b>Serotherapy</b>                                                                                                                 |                    |               |
| Anti-Thymocyte Globulin                                                                                                            | 19 (43%)           | 83 (44%)      |
| Alemtuzumab                                                                                                                        | 2 (5%)             | 24 (12%)      |
| None                                                                                                                               | 23 (52%)           | 83 (44%)      |
| <b>GVHD in First Year After Transplant</b>                                                                                         |                    |               |
| None (no acute or chronic)                                                                                                         | N/A                | 87 (46%)      |
| Acute GVHD Only Before Day 100                                                                                                     | N/A                | 45 (24%)      |
| Late Acute GVHD After Day 100                                                                                                      | N/A                | 58 (30%)      |
| <b>Maximal Grade Acute GVHD (n=45)</b>                                                                                             |                    |               |
| Grade 1                                                                                                                            | N/A                | 19 (42%)      |
| Grade 2                                                                                                                            | N/A                | 17 (38%)      |
| Grade 3                                                                                                                            | N/A                | 7 (16%)       |
| Grade 4                                                                                                                            | N/A                | 2 (4%)        |
| <b>Type of Late Acute GVHD (n=58)</b>                                                                                              |                    |               |
| <i>De Novo</i> (no previous acute)                                                                                                 | N/A                | 12 (21%)      |
| <i>Recurrent</i> (previous acute that resolved then returned as late acute GVHD)                                                   | N/A                | 18 (31%)      |
| <i>Progressive</i> (acute GVHD that progressed after day 100 into late acute GVHD)                                                 | N/A                | 28 (48%)      |
| <b>Type of Chronic GVHD (N=44)</b>                                                                                                 |                    |               |
| <i>De Novo</i> (no previous history of any GVHD before onset of chronic GVHD)                                                      | 7 (16%)            | N/A           |
| <i>Quiescent</i> (history of previous acute GVHD that resolved and later developed chronic GVHD)                                   | 19 (43%)           | N/A           |
| <i>Progressive</i> (history of acute or late acute GVHD that developed into chronic GVHD, including all cases of overlap syndrome) | 18 (41%)           | N/A           |
| <b>Maximal NIH Severity of Chronic GVHD in First Year Post Transplant (n=44)</b>                                                   |                    |               |
| Mild                                                                                                                               | 10 (23%)           | N/A           |
| Moderate                                                                                                                           | 16 (36%)           | N/A           |
| Severe                                                                                                                             | 18 (41%)           | N/A           |

## I. Flow Cytometry / Phenotyping Methods and Cellular Populations

Blood was drawn from the study participant and shipped overnight to arrive in the Schultz laboratory the following day. Phenotyping was usually performed on the day of sample arrival in the Schultz laboratory, and always within 5-days. Six flow cytometry panels were designed to evaluate for various subpopulations of T, T<sub>REGS</sub>, B, NK cells, and myeloid cells. All antibodies, corresponding conjugated dyes, and vendors are provided here:

**Supplementary Table 2. Flow cytometry antibodies used per panel**

| <b>Panel 1 (B-Cell)</b>      |                      |                       |                       |                     |
|------------------------------|----------------------|-----------------------|-----------------------|---------------------|
|                              | <b>Fluorophore</b>   | <b>Antibody</b>       | <b>Catalog Number</b> | <b>Manufacturer</b> |
| 1                            | Pacific Blue         | Anti-human CD19       | 302232                | BioLegend           |
| 2                            | FITC                 | Anti-human CD21       | 354910                | BioLegend           |
| 3                            | PE                   | Anti-human CD38       | 303506                | BioLegend           |
| 4                            | APC                  | Anti-human CD10       | 312210                | BioLegend           |
| 5                            | Brilliant Violet 785 | Anti-human CD27       | 302832                | BioLegend           |
| 6                            | PerCP                | Anti-human CD5        | 300618                | BioLegend           |
| 7                            | Brilliant Violet 510 | Anti-human IgD        | 348220                | BioLegend           |
| <b>Panel 2 (NK Cell)</b>     |                      |                       |                       |                     |
|                              | <b>Fluorophore</b>   | <b>Antibody</b>       | <b>Catalog Number</b> | <b>Manufacturer</b> |
| 1                            | PerCP                | Anti-human CD3        | 300428                | BioLegend           |
| 2                            | Alexa Fluor 488      | Anti-human CD56       | 304611                | BioLegend           |
| 3                            | Brilliant Violet 421 | Anti-human CD335      | 331914                | BioLegend           |
| 4                            | Alexa Fluor 647      | Anti-human CD69       | 310918                | BioLegend           |
| 5                            | PE                   | Anti-human CD337      | 325208                | BioLegend           |
| 6                            | APC Cy7              | Anti-human CXCR3      | 353722                | BioLegend           |
| <b>Panel 3 (T cytotoxic)</b> |                      |                       |                       |                     |
|                              | <b>Fluorophore</b>   | <b>Antibody</b>       | <b>Catalog Number</b> | <b>Manufacturer</b> |
| 1                            | PE                   | Anti-human CD56       | 304606                | BioLegend           |
| 2                            | APC Cy7              | Anti-human CD3        | 300426                | BioLegend           |
| 3                            | Pacific Blue         | Anti-human CD8        | 301033                | BioLegend           |
| 4                            | Alexa Fluor 488      | Anti-human Perforin   | 308108                | BioLegend           |
| 5                            | Alexa Fluor 647      | Anti-human Granzyme B | 515406                | BioLegend           |
| <b>Panel 4 (TCM/TEM)</b>     |                      |                       |                       |                     |
|                              | <b>Fluorophore</b>   | <b>Antibody</b>       | <b>Catalog Number</b> | <b>Manufacturer</b> |
| 1                            | APC Cy7              | Anti-human CD3        | 300426                | BioLegend           |
| 2                            | Alexa Fluor 488      | Anti-human CD4        | 344618                | BioLegend           |
| 3                            | Pacific Blue         | Anti-human CD45RA     | 304123                | BioLegend           |
| 4                            | PE                   | Anti-human CCR7       | 353204                | BioLegend           |
| 5                            | Brilliant Violet 510 | Anti-human CD8        | 301048                | BioLegend           |

|                             |                      |                   |                       |                     |
|-----------------------------|----------------------|-------------------|-----------------------|---------------------|
| 6                           | Brilliant Violet 785 | Anti-human CD27   | 302832                | BioLegend           |
| 7                           | Alexa Fluor 647      | Anti-human PD1    | 329910                | BioLegend           |
| <b>Panel 5 (Treg)</b>       |                      |                   |                       |                     |
|                             | <b>Fluorophore</b>   | <b>Antibody</b>   | <b>Catalog Number</b> | <b>Manufacturer</b> |
| 1                           | APC Cy7              | Anti-human CD3    | 300426                | BioLegend           |
| 2                           | Brilliant Violet 785 | Anti-human CD4    | 317442                | BioLegend           |
| 3                           | FITC                 | Anti-human CD45RA | 304106                | BioLegend           |
| 4                           | PE                   | Anti-human CD25   | 356104                | BioLegend           |
| 5                           | PerCP Cy5.5          | Anti-human CD127  | 351322                | BioLegend           |
| 6                           | Alexa Fluor 647      | Anti-human PD1    | 329910                | BioLegend           |
| 7                           | Brilliant Violet 421 | Anti-human CD31   | 303124                | BioLegend           |
| <b>Panel 6 (Leukocytes)</b> |                      |                   |                       |                     |
|                             | <b>Fluorophore</b>   | <b>Antibody</b>   | <b>Catalog Number</b> | <b>Manufacturer</b> |
| 1                           | Alexa Fluor 647      | Anti-human CD45   | 304018                | BioLegend           |
| 2                           | PerCP                | Anti-human CD3    | 300428                | BioLegend           |
| 3                           | Brilliant Violet 785 | Anti-human CD19   | 302240                | BioLegend           |
| 4                           | Alexa Fluor 488      | Anti-human CD56   | 304611                | BioLegend           |
| 5                           | PE                   | Anti-human CD66b  | 305106                | BioLegend           |
| 6                           | APC-eFluor 780       | Anti-human CD14   | 47-0149-42            | Invitrogen          |
| 7                           | Brilliant Violet 421 | Anti-human CD13   | 301716                | BioLegend           |

Samples were stained in the dark for 12 minutes at room temperature followed by treatment with fix/red blood cell lyse solution (eBiosciences, Thermo Fisher Scientific, Waltham, MA). For intracellular staining, cells were made permeable using BD Perm II solution (BD Biosciences Mississauga, ON, Canada). Flow cytometry data were acquired using BD LSR Fortessa X-20 Special Order four channel flow cytometer (BD Biosciences, San Jose, CA). A minimum of 300,000 events were acquired for all panels. Instrument settings was also standardized using SPHERO Rainbow Calibration particles 6 peaks (SpheroTech, Lake Forest, IL) to adjust laser power drifts over time. Flow cytometry analysis files were analyzed using Kaluza software v2 (Beckman Coulter, Mississauga, ON, Canada). Flow cytometry accuracy and reproducibility were ensured by the approaches described in detail in the supplement of Schultz et al. Blood 2020: 135(15): 1287-1298 (reference 17 in manuscript) with minimal batch variability.

Cellular subpopulations were defined as follows (adapted from Schultz et al. Blood 2020: 135(15): 1287-1298):

### Supplementary Table 3: Immunophenotype and Cell Type Subpopulation

| <b>Naïve T helper cell populations</b> |                                                                  |
|----------------------------------------|------------------------------------------------------------------|
| <i>Naïve Th cells</i>                  | CD31 <sup>-</sup> CD45RA <sup>+</sup> CD4 <sup>+</sup> T cells   |
| <i>RTE Naïve Th cells</i>              | CD31 <sup>+</sup> CD45RA <sup>+</sup> CD4 <sup>+</sup> T cells   |
| <i>PD1<sup>+</sup> Naïve Th cells</i>  | PD1 <sup>+</sup> CD45RA <sup>+</sup> CD4 <sup>+</sup> T cells    |
| <i>PD1<sup>-</sup> Naïve Th cells</i>  | PD1 <sup>-</sup> CD45RA <sup>+</sup> CD4 <sup>+</sup> T cells    |
| <i>CCR7<sup>+</sup> Naïve Th cells</i> | CCR7 <sup>+/−</sup> CD45RA <sup>+</sup> CD4 <sup>+</sup> T cells |
| <i>CCR7<sup>-</sup> Naïve Th cells</i> | CCR7 <sup>-</sup> CD45RA <sup>+</sup> CD4 <sup>+</sup> T cells   |

|                                                                                                                                                                                                                                                            |                                                                                                                                                                                                                                                                                                                                                                                                                                                                                                                                            |
|------------------------------------------------------------------------------------------------------------------------------------------------------------------------------------------------------------------------------------------------------------|--------------------------------------------------------------------------------------------------------------------------------------------------------------------------------------------------------------------------------------------------------------------------------------------------------------------------------------------------------------------------------------------------------------------------------------------------------------------------------------------------------------------------------------------|
| CD27 <sup>+</sup> Naïve Th cells<br>CD27 <sup>-</sup> Naïve Th cells<br>Follicular Th cells                                                                                                                                                                | CD27 <sup>+</sup> CD45RA <sup>+</sup> CD4 <sup>+</sup> T cells<br>CD27 <sup>-</sup> CD45RA <sup>+</sup> CD4 <sup>+</sup> T cells<br>PD1 <sup>++</sup> CD45RA <sup>+</sup> CD4 <sup>+</sup> T cells                                                                                                                                                                                                                                                                                                                                         |
| <b>Memory T helper cell populations</b>                                                                                                                                                                                                                    |                                                                                                                                                                                                                                                                                                                                                                                                                                                                                                                                            |
| PD1 <sup>+/-</sup> memory Th cells<br>CCR7 <sup>+</sup> Memory Th cells<br>CCR7 <sup>-</sup> Memory Th cells<br>CD27 <sup>+/-</sup> Memory Th cells<br>CD31 <sup>-</sup> Memory Th cells<br>RTE Memory Th cells                                            | PD1 <sup>+/-</sup> CD45RA <sup>-</sup> CD4 <sup>+</sup> T cells<br>CCR7 <sup>+</sup> CD45RA <sup>-</sup> CD4 <sup>+</sup> T cells<br>CCR7 <sup>-</sup> CD45RA <sup>-</sup> CD4 <sup>+</sup> T cells<br>CD27 <sup>+/-</sup> CD45RA <sup>-</sup> CD4 <sup>+</sup> T cells<br>CD31 <sup>-</sup> CD45RA <sup>-</sup> CD4 <sup>+</sup> T cells<br>CD31 <sup>+</sup> CD45RA <sup>-</sup> CD4 <sup>+</sup> T cells                                                                                                                                |
| <b>Naïve Tc cell populations</b>                                                                                                                                                                                                                           |                                                                                                                                                                                                                                                                                                                                                                                                                                                                                                                                            |
| Naïve Tc cells<br>RTE Naïve Tc cells<br>PD1 <sup>+</sup> Naïve Tc cells<br>PD1 <sup>-</sup> Naïve Tc cells<br>CCR7 <sup>+</sup> Naïve Tc cells<br>CCR7 <sup>-</sup> Naïve Tc cells<br>CD27 <sup>+</sup> Naïve Tc cells<br>CD27 <sup>-</sup> Naïve Tc cells | CD31 <sup>-</sup> CD45RA <sup>+</sup> CD8 <sup>+</sup> T cells<br>CD31 <sup>+</sup> CD45RA <sup>+</sup> CD8 <sup>+</sup> T cells<br>PD1 <sup>+</sup> CD45RA <sup>+</sup> CD8 <sup>+</sup> T cells<br>PD1 <sup>-</sup> CD45RA <sup>+</sup> CD8 <sup>+</sup> T cells<br>CCR7 <sup>+</sup> CD45RA <sup>+</sup> CD8 <sup>+</sup> T cells<br>CCR7 <sup>-</sup> CD45RA <sup>+</sup> CD8 <sup>+</sup> T cells<br>CD27 <sup>+</sup> CD45RA <sup>+</sup> CD8 <sup>+</sup> T cells<br>CD27 <sup>-</sup> CD45RA <sup>+</sup> CD8 <sup>+</sup> T cells |
| <b>Memory Tc cell populations</b>                                                                                                                                                                                                                          |                                                                                                                                                                                                                                                                                                                                                                                                                                                                                                                                            |
| PD1 <sup>+/-</sup> memory Tc cells<br>CCR7 <sup>+/-</sup> Memory Tc cells<br>Cytolytic Tc cells<br>CD27 <sup>+/-</sup> Tc cells                                                                                                                            | PD1 <sup>+/-</sup> CD45RA <sup>-</sup> CD8 <sup>+</sup><br>CCR7 <sup>+/-</sup> CD45RA <sup>-</sup> CD8 <sup>+</sup> T cells<br>Perforin <sup>+</sup> Granzyme B <sup>+</sup> CD8 <sup>+</sup><br>CD27 <sup>+/-</sup> CD45RA <sup>-</sup> CD4 <sup>+</sup> T cells                                                                                                                                                                                                                                                                          |
| <b>Treg cells</b>                                                                                                                                                                                                                                          |                                                                                                                                                                                                                                                                                                                                                                                                                                                                                                                                            |
| All Memory T <sub>reg</sub> populations<br><br>RTE Memory T <sub>reg</sub> populations<br>PD1 <sup>-</sup> Memory Treg<br>PD1 <sup>+</sup> Memory Treg                                                                                                     | CD45RA <sup>-</sup> Treg cells<br>CD31 <sup>-</sup> CD45RA <sup>-</sup> T <sub>reg</sub> cells<br>CD31 <sup>+</sup> CD45RA <sup>-</sup> T <sub>reg</sub> cells<br>PD1 <sup>-</sup> CD45RA <sup>-</sup> Treg cells<br>PD1 <sup>+</sup> CD45RA <sup>+</sup> Treg cells                                                                                                                                                                                                                                                                       |
| PD1 <sup>+</sup> Naïve Treg cells<br>PD1 <sup>-</sup> Naïve Treg<br>Naïve T <sub>reg</sub> populations<br>RTE Naïve T <sub>reg</sub> populations                                                                                                           | PD1 <sup>+</sup> CD45RA <sup>+</sup> T <sub>reg</sub> cells<br>PD1 <sup>-</sup> CD45RA <sup>+</sup> T <sub>reg</sub> cells<br>CD31 <sup>-</sup> CD45RA <sup>+</sup> T <sub>reg</sub> cells<br>CD31 <sup>+</sup> CD45RA <sup>+</sup> T <sub>reg</sub> cells                                                                                                                                                                                                                                                                                 |
| <b>B cell populations</b>                                                                                                                                                                                                                                  |                                                                                                                                                                                                                                                                                                                                                                                                                                                                                                                                            |
| T1 –Transitional consistent with Breg cells                                                                                                                                                                                                                | CD10 <sup>high</sup> CD38 <sup>high</sup> CD19 <sup>+</sup> B cells                                                                                                                                                                                                                                                                                                                                                                                                                                                                        |
| CD21 <sup>low</sup> B cells                                                                                                                                                                                                                                | CD21 <sup>low</sup> CD19 <sup>+</sup> B cells                                                                                                                                                                                                                                                                                                                                                                                                                                                                                              |
| T2 transitional                                                                                                                                                                                                                                            | CD38 <sup>int</sup> CD10 <sup>int</sup> CD19 <sup>+</sup> B cells                                                                                                                                                                                                                                                                                                                                                                                                                                                                          |
| T3 transitional                                                                                                                                                                                                                                            | CD38 <sup>dim</sup> CD10 <sup>low</sup> CD19 <sup>+</sup> B cells                                                                                                                                                                                                                                                                                                                                                                                                                                                                          |
| Mature Naïve B cells                                                                                                                                                                                                                                       | IgD <sup>+</sup> CD27 <sup>-</sup> CD19 <sup>+</sup> B cells                                                                                                                                                                                                                                                                                                                                                                                                                                                                               |
| Unswitched memory/ Marginal-zone like                                                                                                                                                                                                                      | IgD <sup>+</sup> CD27 <sup>+</sup> CD19 <sup>+</sup> B cells                                                                                                                                                                                                                                                                                                                                                                                                                                                                               |
| Classic Switched memory                                                                                                                                                                                                                                    | IgD <sup>-</sup> CD27 <sup>+</sup> CD19 <sup>+</sup> B cells                                                                                                                                                                                                                                                                                                                                                                                                                                                                               |
| Late Memory B cell                                                                                                                                                                                                                                         | IgD <sup>-</sup> CD27 <sup>-</sup> CD19 <sup>+</sup> B cells                                                                                                                                                                                                                                                                                                                                                                                                                                                                               |
| Plasma cells                                                                                                                                                                                                                                               | CD38 <sup>high</sup> CD10 <sup>-</sup> CD19 <sup>+</sup> B cells                                                                                                                                                                                                                                                                                                                                                                                                                                                                           |
| <b>Regulatory NK cells (noncytolytic)</b>                                                                                                                                                                                                                  |                                                                                                                                                                                                                                                                                                                                                                                                                                                                                                                                            |
| NK <sub>reg</sub> cells                                                                                                                                                                                                                                    | CD56 <sup>high</sup> Perforin <sup>low</sup> NK cells<br>CD56 <sup>high</sup> CD335 <sup>high</sup> NK cells<br>CD56 <sup>high</sup> Granzyme B <sup>low</sup> NK cells                                                                                                                                                                                                                                                                                                                                                                    |
| CD56 <sup>bright</sup> cytolytic NK cells                                                                                                                                                                                                                  | CD56 <sup>high</sup> CD335 <sup>high</sup> NK cells<br>CD56 <sup>high</sup> Perforin <sup>high</sup> NK cells                                                                                                                                                                                                                                                                                                                                                                                                                              |

|                                                 |                                                                                                                                                                       |
|-------------------------------------------------|-----------------------------------------------------------------------------------------------------------------------------------------------------------------------|
| <i>Activated CD56<sup>bright</sup> NK cells</i> | CD56 <sup>high</sup> Granzyme B <sup>high</sup> NK cells<br>CD56 <sup>high</sup> CD69 <sup>+</sup> NK cells                                                           |
| <i>Classic NK cells</i>                         | CD56 <sup>low</sup> CD335 <sup>low</sup> NK cells<br>CD56 <sup>low</sup> Perforin <sup>high</sup> NK cells<br>CD56 <sup>low</sup> Granzyme B <sup>high</sup> NK cells |
| <i>Activated classic NK cells</i>               | CD56 <sup>low</sup> CD69 <sup>+</sup> NK cells                                                                                                                        |
| <i>NKT cells</i>                                | CD56 <sup>+</sup> CD3 <sup>+</sup>                                                                                                                                    |
| <b>Myeloid Population</b>                       |                                                                                                                                                                       |
| <i>Monocytes</i>                                | CD14 <sup>+</sup> CD45 <sup>+</sup>                                                                                                                                   |
| <i>Monocytes/Neutrophils</i>                    | CD66b <sup>+</sup> CD45 <sup>+</sup>                                                                                                                                  |

## II. Development of Machine Learning-Based Classifier for Chronic GVHD Diagnosis

In addition to analyzing each marker in a univariate manner, we developed a machine learning-based classifier that combines multiple cellular and plasma markers along with clinical factors for diagnosing whether a patient has cGVHD. The approach is summarized in Figure 4 of the manuscript. We first randomly selected 10 cGVHD samples and 10 control samples as the test set for classifier evaluation. If a control sample was from one of the selected cGVHD subjects (i.e., a measurement made prior to cGVHD onset) or another sample had already been drawn from the same control subject, we randomly drew another control sample, since in real clinical settings, we would immediately diagnose a subject when marker measurements become available. All remaining samples, except those acquired at later time points from subjects in the test set, were used for classifier training. To account for outlier marker values, we performed winsorization by first estimating the median and median absolute deviation (MAD) of each marker based on the training samples. We then clipped all marker values at 3 standard deviations away from the training median with standard deviation estimated as  $1.483 \cdot \text{MAD}$ .<sup>1</sup> To deal with missing marker values in the training set, we applied k-nearest neighbors (k=15) to impute the

missing values. To reduce the number of markers, we performed feature selection using a bootstrapping approach. Specifically, we extracted 1,000 bootstrap samples from the training set. For each bootstrap sample, we applied a Student's t-test to compare the marker values of cGVHD samples against controls for each marker. Markers with  $p < 0.05$  for  $>99\%$  of the bootstrap samples (i.e., selection frequency  $>0.99$ ) were selected for classifier training. We trained a support vector machine (SVM) classifier with the selected markers and all clinical factors used in the regression analysis. SVM finds an optimal weighting of the selected markers and clinical factors that best separates cGVHD samples from control samples. To account for class imbalance (i.e., the training set had many more control samples than cGVHD samples), we set the penalty weight for misclassifying cGVHD (controls) to the number of training samples over the number of cGVHD (control) samples. Setting a higher penalty for misclassifying cGVHD reduces the bias towards classifying samples as controls. To deal with missing marker values in the test set, we applied k-nearest neighbors ( $k=15$ ) using only values of the selected markers from training samples to impute the missing values in each test sample. Imputing each test sample separately without using other test samples better emulates real clinical settings. To evaluate the classifier, we applied it to the test set and computed its positive predictive value (PPV), negative predictive value (NPV), and area under the receiver operator characteristic curve (AUC). PPV is the proportion of test samples classified as cGVHD that are truly cGVHD, and NPV is the proportion of test samples classified as controls that are truly controls. The described procedures were repeated 1,000 times with different random train-test sample splits to assess variability in classification performance arising from sample variability. The average training AUC over the 1,000 random train-test sample splits was  $0.95 (\pm 0.01)$ . We note that the selected markers would



normally vary across random train-test sample splits due to sample variability. However, since we used a bootstrapping procedure with an extremely high selection frequency threshold of 99%, the selected markers highly overlapped across the random train-test sample splits. To report one representative set of markers for future validation, two common strategies are often taken in practice. One strategy is to report markers that are selected in majority (e.g. 99%) of the random train-test sample splits. The other strategy is to apply the marker selection procedure to all samples. Since we used bootstrapping with a selection frequency threshold of 99% as our marker selection procedure, the selected markers were identical with both strategies. The reported selection frequencies correspond to applying our marker selection procedure to all samples.

**Reference:**

1. I. Gijbels, M. Hubert: Robust and Nonparametric Statistical Methods, in Brown SD, Tauler R, and Walczak B (eds): Comprehensive Chemometrics. Chemical and Biochemical Data Analysis. Elsevier, 2009, volume 1, pp 189-211.

**Supplementary Table 4. Mixed effect modeling of cellular and plasma chronic GVHD diagnostic biomarkers (present at the onset of chronic GVHD) compared to control individuals without chronic GVHD.** Chronic GVHD patients included all chronic GVHD severities (mild, moderate, severe) according to the NIH consensus criteria. Biomarkers highlighted in blue also met the same criteria at all three time points in the fixed effect model. Biomarkers highlighted in yellow met the same criteria in one or two time points (but not all three time points) in the fixed effect model. AUC, Area Under Curve; NK<sub>REG</sub>, Regulatory NK cell; RTE, Recent Thymic Emigrant (CD4<sup>+</sup>CD45RA<sup>+</sup>CD31<sup>+</sup>); Th, Helper T cell (CD4<sup>+</sup>); T<sub>REG</sub>, Regulatory T cell (CD4<sup>+</sup>CD127<sup>LOW</sup>CD25<sup>+</sup>).

| <b>Cellular Biomarkers</b>                                                                         |                                           |                                                                            |                         |                        |            |
|----------------------------------------------------------------------------------------------------|-------------------------------------------|----------------------------------------------------------------------------|-------------------------|------------------------|------------|
| <b>Diagnostic Biomarker<br/>(As a % of Parent Cell Population)</b>                                 | <b>Relationship cGvHD to<br/>Controls</b> | <b>Mean Absolute Values<br/>(All cGvHD Cases<br/>Compared to Controls)</b> | <b>Effect<br/>Ratio</b> | <b>P-value</b>         | <b>AUC</b> |
| <b><i>Natural Killer Cells</i></b>                                                                 |                                           |                                                                            |                         |                        |            |
| CD56 <sup>+</sup> NK cells (% of lymphocytes)                                                      | Decreased                                 | 9.7% vs 13.6%                                                              | 0.71                    | 0.0001                 | 0.71       |
| <b><i>Regulatory Natural Killer Cells (NK<sub>REG</sub>)</i></b>                                   |                                           |                                                                            |                         |                        |            |
| CD56 <sup>bright</sup> Perforin <sup>Negative</sup> (%CD56)<br>(NK <sub>REG</sub> , Non-Cytolytic) | Decreased                                 | 13.6% vs 25.7%                                                             | 0.53                    | 2.5 x 10 <sup>-4</sup> | 0.68       |
| <b><i>Naïve Helper T Cells (Naïve Th)</i></b>                                                      |                                           |                                                                            |                         |                        |            |
| CD4+CD45RA+ (%CD3)                                                                                 | Decreased                                 | 6.4% vs 13.9%                                                              | 0.46                    | 3.5 x 10 <sup>-6</sup> | 0.75       |
| CD4+CD45RA+ CCR7+ (%CD4)                                                                           | Decreased                                 | 9.6% vs 25.9%                                                              | 0.37                    | 9.3 x 10 <sup>-8</sup> | 0.78       |
| CD4+CD45RA+PD1- (%CD4)                                                                             | Decreased                                 | 13.1% vs 25.7%                                                             | 0.51                    | 4.9 x 10 <sup>-6</sup> | 0.73       |
| CD4+CD45RA+CD27+ (%CD4)                                                                            | Decreased                                 | 11.7% vs 26.6%                                                             | 0.44                    | 6.6 x 10 <sup>-8</sup> | 0.77       |
| CD4+CD45RA+CD31+ (%CD4)<br>(Recent Thymic Emigrants)                                               | Decreased                                 | 8.5% vs 23.7%                                                              | 0.36                    | 1.1 x 10 <sup>-6</sup> | 0.76       |

| <b>Naïve Regulatory T Cells (<math>T_{REG}</math>)</b>                              |                                |                                                             |              |                      |      |
|-------------------------------------------------------------------------------------|--------------------------------|-------------------------------------------------------------|--------------|----------------------|------|
| CD45RA+PD1- $T_{REG}$ (% $T_{REG}$ )                                                | Decreased                      | 10.2% vs 23.5%                                              | 0.43         | $3.5 \times 10^{-6}$ | 0.73 |
| CD45RA+CD31+ $T_{REG}$ (% $T_{REG}$ )<br>(Recent Thymic Emigrant, Naïve $T_{REG}$ ) | Decreased                      | 5.3% vs 15.5%                                               | 0.34         | $1.7 \times 10^{-5}$ | 0.72 |
| <b>Memory Helper T Cells</b>                                                        |                                |                                                             |              |                      |      |
| CD4+ CD45RA-CCR7- (%CD4)<br>(Effector Memory Th)                                    | Increased                      | 45.4% vs 32.3%                                              | 1.40         | $5.4 \times 10^{-5}$ | 0.68 |
| <b>Plasma Biomarkers</b>                                                            |                                |                                                             |              |                      |      |
| Diagnostic Biomarker                                                                | Relationship cGvHD to Controls | Mean Absolute Values (All cGvHD Cases Compared to Controls) | Effect Ratio | P-value              | AUC  |
| CXCL9 (pg/mL)                                                                       | Increased                      | 421 vs 162 pg/mL                                            | 2.59         | $1 \times 10^{-16}$  | 0.77 |
| CXCL10 (pg/mL)                                                                      | Increased                      | 609 vs 250 pg/mL                                            | 2.44         | $1 \times 10^{-16}$  | 0.71 |
| CXCL11 (pg/mL)                                                                      | Increased                      | 2132 vs 921 pg/mL                                           | 2.31         | $1.5 \times 10^{-9}$ | 0.70 |
| ICAM-1 (ng/mL)                                                                      | Increased                      | 510 vs 364 ng/mL                                            | 1.4          | $1 \times 10^{-7}$   | 0.71 |
| ST2 (pg/mL)                                                                         | Increased                      | 59,644 vs 23,669 pg/mL                                      | 2.52         | $1 \times 10^{-11}$  | 0.73 |
| sCD13 (Aminopeptidase N) Enzyme Activity mU/mL                                      | Increased                      | 1.02 vs 0.68 mU/mL                                          | 1.49         | $5.6 \times 10^{-7}$ | 0.71 |

**Supplementary Table 5. Mixed effect modeling of cellular and plasma chronic GVHD diagnostic biomarkers (present at the onset of chronic GVHD) in moderate-severe chronic NIH consensus criteria GVHD (n=34) compared to control individuals without chronic GVHD.** Patients with mild chronic GVHD according to the NIH consensus criteria were removed from analysis. AUC, Area Under Curve; NK<sub>REG</sub>, Regulatory NK cell; RTE, Recent Thymic Emigrants (CD4<sup>+</sup>CD45RA<sup>+</sup>CD31<sup>+</sup>); Th, Helper T cell (CD4<sup>+</sup>); T<sub>REG</sub>, Regulatory T cell (CD4<sup>+</sup>CD127<sup>LOW</sup>CD25<sup>+</sup>).

| Cellular Biomarkers                                                                                        |                                      |                                                                   |                 |                        |      |
|------------------------------------------------------------------------------------------------------------|--------------------------------------|-------------------------------------------------------------------|-----------------|------------------------|------|
| Diagnostic Biomarker<br>(As a % of Parent Cell Population)                                                 | Relationship<br>cGvHD to<br>Controls | Mean Absolute Values<br>(All cGvHD Cases<br>compared to controls) | Effect<br>Ratio | P-value                | AUC  |
| <b>Regulatory Natural Killer Cells (NK<sub>REG</sub>)</b>                                                  |                                      |                                                                   |                 |                        |      |
| CD56 <sup>Bright</sup> Perforin <sup>NEGATIVE</sup><br>(%CD56)<br>(NK <sub>REG</sub> Non-Cytolytic)        | Decreased                            | 12% vs 25.8%                                                      | 0.47            | 1.2 x 10 <sup>-5</sup> | 0.73 |
| CD56 <sup>Bright</sup> Granzyme B <sup>NEGATIVE</sup><br>(%CD56)<br>(NK <sub>REG</sub> Non-Cytolytic)      | Decreased                            | 6.4% vs 16.9%                                                     | 0.38            | 0.0003                 | 0.69 |
| <b>Naïve Helper T Cells (Naïve Th)</b>                                                                     |                                      |                                                                   |                 |                        |      |
| CD4+CD45RA+ (%CD3)                                                                                         | Decreased                            | 6.3% vs 13.9%                                                     | 0.45            | 7.4 x 10 <sup>-5</sup> | 0.74 |
| CD4+CD45RA+CCR7+ (%CD4)                                                                                    | Decreased                            | 9.9% vs 25.9%                                                     | 0.38            | 6.3 x 10 <sup>-7</sup> | 0.78 |
| CD4+CD45RA+PD1- (%CD4)                                                                                     | Decreased                            | 12.9% vs 25.7%                                                    | 0.50            | 1.7 x 10 <sup>-5</sup> | 0.74 |
| CD4+CD45RA+CD27+ (%CD4)                                                                                    | Decreased                            | 12.2% vs 26.7%                                                    | 0.46            | 5.2 x 10 <sup>-7</sup> | 0.77 |
| CD4+CD45RA+CD31+ (%CD4)<br>(Recent Thymic Emigrants)                                                       | Decreased                            | 8.9% vs 23.7%                                                     | 0.37            | 1.2 x 10 <sup>-5</sup> | 0.75 |
| <b>Naïve Regulatory T Cells (T<sub>REG</sub>)</b>                                                          |                                      |                                                                   |                 |                        |      |
| CD45RA+PD1- T <sub>REG</sub> (%T <sub>REG</sub> )                                                          | Decreased                            | 9.6% vs 23.5%                                                     | 0.41            | 8.1 x 10 <sup>-6</sup> | 0.74 |
| CD45RA+CD31+ T <sub>REG</sub> (%T <sub>REG</sub> )<br>(Recent Thymic Emigrant,<br>Naïve T <sub>REG</sub> ) | Decreased                            | 5.4% vs 15.6%                                                     | 0.35            | 0.0001                 | 0.72 |
| <b>Memory Helper T Cells</b>                                                                               |                                      |                                                                   |                 |                        |      |
| CD4+CD45RA-CCR7- (%CD4)<br>(Effector Memory Th)                                                            | Increased                            | 43.8% vs 32.3%                                                    | 1.36            | 0.0001                 | 0.69 |
| <b>Plasma Biomarkers</b>                                                                                   |                                      |                                                                   |                 |                        |      |
| Diagnostic Biomarker                                                                                       | Relationship<br>cGvHD to<br>Controls | Mean Absolute Values<br>(All cGvHD Cases<br>compared to controls) | Effect<br>Ratio | P-value                | AUC  |
| CXCL9 (pg/mL)                                                                                              | Increased                            | 448 vs 163                                                        | 2.74            | 1 x 10 <sup>-16</sup>  | 0.78 |

|                                                   |           |                        |      |                      |      |
|---------------------------------------------------|-----------|------------------------|------|----------------------|------|
| CXCL10 (pg/mL)                                    | Increased | 652 vs 250 pg/mL       | 2.6  | $1 \times 10^{-16}$  | 0.72 |
| CXCL11 (pg/mL)                                    | Increased | 2235 vs 927 pg/mL      | 2.4  | $2.4 \times 10^{-9}$ | 0.72 |
| ICAM-1 (ng/mL)                                    | Increased | 511 vs 364 ng/mL       | 1.4  | $1.1 \times 10^{-7}$ | 0.73 |
| ST2 (pg/mL)                                       | Increased | 63,984 vs 23,376 pg/mL | 2.73 | $8 \times 10^{-11}$  | 0.74 |
| sCD13 (Aminopeptidase N)<br>Enzyme Activity mU/mL | Increased | 1.04 vs 0.68 mU/mL     | 1.53 | $5.3 \times 10^{-6}$ | 0.72 |

**Supplementary Table 6. Fixed effect modeling of cellular and plasma chronic GVHD diagnostic biomarkers (present at the onset of chronic GVHD) compared to all control individuals without chronic GVHD.** Chronic GVHD patients included all chronic GVHD severities (mild, moderate, severe), according to the NIH consensus criteria. Markers highlighted in blue met these three criteria at all three time points of chronic GVHD onset (early-, mid-, and late-onset). Markers highlighted in yellow met the three criteria at one or two (but not all three) time points for chronic GVHD onset. AUC, Area Under Curve; NK<sub>REG</sub>, Regulatory NK cell; RTE, Recent Thymic Emigrants (CD4<sup>+</sup>CD45RA<sup>+</sup>CD31<sup>+</sup>); Th, Helper T cell (CD4<sup>+</sup>); T<sub>REG</sub>, Regulatory T cell (CD4<sup>+</sup>CD127<sup>LOW</sup>CD25<sup>+</sup>).

| Diagnostic Marker                                                                               | Early Onset cGvHD (<4 months) (n=11) |                                     |               | Mid Onset cGvHD (4-8 months) (n=24) |                                     |               | Late Onset cGvHD (≥8 months) (n=9) |                                     |               |
|-------------------------------------------------------------------------------------------------|--------------------------------------|-------------------------------------|---------------|-------------------------------------|-------------------------------------|---------------|------------------------------------|-------------------------------------|---------------|
|                                                                                                 | Relationship of cGvHD to Control     | Mean Absolute Values (Effect Ratio) | p-value (AUC) | Relationship of cGvHD to Control    | Mean Absolute Values (Effect Ratio) | p-value (AUC) | Relationship of cGvHD to Control   | Mean Absolute Values (Effect Ratio) | p-value (AUC) |
| <b>Cellular Biomarkers</b>                                                                      |                                      |                                     |               |                                     |                                     |               |                                    |                                     |               |
| <b>Natural Killer Cells</b>                                                                     |                                      |                                     |               |                                     |                                     |               |                                    |                                     |               |
| CD56 <sup>+</sup> NK cells (% of lymphocytes)                                                   | Decreased                            | 9.9% vs 20.0% (0.50)                | 0.003 (0.81)  | Decreased                           | 9.9% vs 13.4% (0.74)                | 0.02 (0.65)   | Not Significant                    | 9.4% vs 7.7% (1.23)                 | 0.99 (0.54)   |
| <b>Regulatory Natural Killer Cells (NK<sub>REG</sub>)</b>                                       |                                      |                                     |               |                                     |                                     |               |                                    |                                     |               |
| CD56 <sup>Bright</sup> Perforin <sup>Negative</sup> (%CD56) (NK <sub>REG</sub> Non-Cytolytic)   | Decreased                            | 20% vs 32.2% (0.62)                 | 0.03 (0.69)   | Decreased                           | 14.9% vs 27.8% (0.54)               | 0.0008 (0.70) | Decreased                          | 5.9% vs 17.1% (0.34)                | 0.004 (0.80)  |
| CD56 <sup>Bright</sup> Granzyme B <sup>Negative</sup> (%CD56) (NK <sub>REG</sub> Non-Cytolytic) | Not Significant                      | 11.1% vs 17.7% (0.63)               | 0.16 (0.61)   | Decreased                           | 8.8% vs 19% (0.46)                  | 0.005 (0.68)  | Decreased                          | 2.6% vs 14% (0.19)                  | 0.008 (0.86)  |
| CD56 <sup>Bright</sup> CD335 <sup>High</sup> (%CD56) (NK <sub>REG</sub> Non-Cytolytic)          | Not Significant                      | 24% vs 33.7% (0.71)                 | 0.07 (0.66)   | Decreased                           | 18.7% vs 28.9% (0.65)               | 0.008 (0.65)  | Decreased                          | 6.8% vs 17.3% (0.40)                | 0.02 (0.73)   |
| <b>Naïve Helper T Cells (Naïve Th)</b>                                                          |                                      |                                     |               |                                     |                                     |               |                                    |                                     |               |
| CD4 <sup>+</sup> CD45RA <sup>+</sup> (%CD3)                                                     | Decreased                            | 3.8% vs 8.8% (0.43)                 | 0.008 (0.74)  | Decreased                           | 5.8% vs 10.2% (0.57)                | 0.04 (0.62)   | Decreased                          | 9.7% vs 22.7% (0.43)                | 0.05 (0.70)   |
| CD4 <sup>+</sup> CD45RA <sup>+</sup> CCR7 <sup>+</sup> (%CD4)                                   | Decreased                            | 5.6% vs 13.6% (0.41)                | 0.005 (0.73)  | Decreased                           | 11.8% vs 21.6% (0.54)               | 0.03 (0.62)   | Decreased                          | 11.4% vs 42.4% (0.27)               | 0.001 (0.84)  |

|                                                                 |                 |                                    |                                |                 |                                     |                                |           |                              |                                 |
|-----------------------------------------------------------------|-----------------|------------------------------------|--------------------------------|-----------------|-------------------------------------|--------------------------------|-----------|------------------------------|---------------------------------|
| CD4+CD45RA+PD1- (%CD4)                                          | Decreased       | 8.4% vs 14.0%<br>(0.60)            | 0.04<br>(0.70)                 | Decreased       | 12.9% vs 21.4%<br>(0.60)            | 0.04<br>(0.61)                 | Decreased | 17.8% vs 41.7%<br>(0.43)     | 0.01 (0.77)                     |
| CD4+CD45RA+CD27+ (%CD4)                                         | Decreased       | 6.5% vs 14.3%<br>(0.45)            | 0.007<br>(0.72)                | Decreased       | 12.3% vs 22.4%<br>(0.55)            | 0.02<br>(0.64)                 | Decreased | 16.3% vs 43.1%<br>(0.38)     | 0.006<br>(0.77)                 |
| CD4+CD45RA+CD31+ (%CD4)<br>(Recent Thymic Emigrants)            | Not Significant | 6.0% vs 11.1%<br>(0.54)            | 0.06<br>(0.68)                 | Decreased       | 9.2% vs 20.7%<br>(0.44)             | 0.009<br>(0.66)                | Decreased | 10.4% vs 39.2%<br>(0.27)     | 0.007<br>(0.80)                 |
| <b>Naïve Regulatory T Cells (<math>T_{REG}</math>)</b>          |                 |                                    |                                |                 |                                     |                                |           |                              |                                 |
| CD45RA+PD1- $T_{REG}$ (% $T_{REG}$ )                            | Decreased       | 9.0% vs 17.9%<br>(0.50)            | 0.009<br>(0.77)                | Decreased       | 11.5% vs 19.2%<br>(0.60)            | 0.01<br>(0.65)                 | Decreased | 10% vs 33.5%<br>(0.30)       | 0.02 (0.78)                     |
| CD45RA+CD31+ $T_{REG}$ (% $T_{REG}$ )<br>(RTE Naïve $T_{REG}$ ) | Decreased       | 3.8% vs 9.3%<br>(0.41)             | 0.02<br>(0.72)                 | Decreased       | 6.3% vs 12.6%<br>(0.50)             | 0.02<br>(0.63)                 | Decreased | 5.9% vs 24.8%<br>(0.24)      | 0.03 (0.77)                     |
| <b>Memory Helper T Cells</b>                                    |                 |                                    |                                |                 |                                     |                                |           |                              |                                 |
| CD4+CD45RA-CCR7- (%CD4)<br>(Effector Memory Th)                 | Not Significant | 51.0% vs 42.7%<br>(1.19)           | 0.10<br>(0.64)                 | Increased       | 44.3% vs 34.2%<br>(1.3)             | 0.03<br>(0.65)                 | Increased | 40.7% vs 20%<br>(2.04)       | 0.0009<br>(0.83)                |
| <b>Plasma Biomarkers</b>                                        |                 |                                    |                                |                 |                                     |                                |           |                              |                                 |
| CXCL9 (pg/mL)                                                   | Increased       | 332 vs 128<br>pg/mL (2.6)          | $1 \times 10^{-5}$<br>(0.73)   | Increased       | 414 vs 197<br>pg/mL (2.1)           | 0.003<br>(0.68)                | Increased | 516 vs 164<br>pg/mL (3.15)   | $3.6 \times 10^{-8}$<br>(0.89)  |
| CXCL10 (pg/mL)                                                  | Increased       | 416 vs 206<br>pg/mL (2.02)         | 0.0002<br>(0.68)               | Increased       | 693 vs 261<br>pg/mL (2.66)          | $3 \times 10^{-7}$<br>(0.70)   | Increased | 719 vs 282<br>pg/mL (2.54)   | 0.01 (0.62)                     |
| CXCL11 (pg/mL)                                                  | Increased       | 1312 vs 768<br>pg/mL (1.71)        | 0.02<br>(0.60)                 | Increased       | 2428 vs 870<br>pg/mL (2.79)         | $8.3 \times 10^{-8}$<br>(0.77) | Increased | 2656 vs 1135<br>pg/mL (2.34) | 0.02 (0.74)                     |
| ICAM-1 (ng/mL)                                                  | Increased       | 435 vs 335<br>ng/mL (1.3)          | 0.03<br>(0.71)                 | Not Significant | 469 vs 390<br>ng/mL (1.20)          | 0.01<br>(0.65)                 | Increased | 626 vs 369<br>ng/mL (1.7)    | 0.00003<br>(0.77)               |
| ST2 (pg/mL)                                                     | Not Significant | 34,187 vs<br>28,594 pg/mL<br>(1.2) | 0.57<br>(0.57)                 | Increased       | 53,642 vs<br>22,922 pg/mL<br>(2.34) | $3.6 \times 10^{-9}$<br>(0.72) | Increased | 91,102 vs<br>19,512 (4.67)   | $1.4 \times 10^{-11}$<br>(0.75) |
| Soluble CD13<br>(Aminopeptidase N)<br>(Enzyme Activity, mU/mL)  | Increased       | 1.02 vs 0.52<br>mU/mL (1.94)       | $1.1 \times 10^{-6}$<br>(0.89) | Not Significant | 0.84 vs 0.80<br>mU/mL (1.05)        | 0.58<br>(0.51)                 | Increased | 1.19 vs 0.72<br>mU/mL (1.64) | $9 \times 10^{-6}$<br>(0.79)    |

**Supplementary Table 7. Classifier weights of various cellular, plasma, and clinical factors used in the diagnostic classifier.**

| <b>Variables</b>                                      | <b>Classifier Weights</b> |
|-------------------------------------------------------|---------------------------|
| CD56 <sup>Bright</sup> Perforin <sup>Negative</sup>   | -0.2652                   |
| CD56 <sup>Bright</sup> Granzyme B <sup>Negative</sup> | -0.1645                   |
| CD4+ CD45RA+ CCR7+                                    | 0.1240                    |
| CD4+ CD45RA+ PD1-                                     | 0.1572                    |
| CD4+ CD45RA+ CD27+                                    | 0.0467                    |
| CD8+ CD45RA+ CCR7+                                    | -0.1375                   |
| CD45RA+ PD1- T <sub>REG</sub>                         | -1.1309                   |
| CD45RA+ CD31+ T <sub>REG</sub>                        | -0.6028                   |
| CD4+ CD45RA+ CD31+ (RTE)                              | -0.0276                   |
| ICAM-1                                                | 0.2784                    |
| CXCL10 (IP10)                                         | 0.7568                    |
| TIM-3                                                 | -0.4277                   |
| ST2                                                   | 0.5265                    |
| CXCL11                                                | 0.1064                    |
| CXCL9                                                 | 0.3146                    |
| Malignant                                             | -0.8049                   |
| PBSC                                                  | 0.4668                    |
| Bone Marrow                                           | -0.1481                   |
| Sibling                                               | 0.3665                    |
| Unrelated                                             | 0.7533                    |
| HLA Antigen Match                                     | -0.1560                   |
| M:M (donor:recipient)                                 | 0.4341                    |
| M:F (donor:recipient)                                 | 0.3455                    |
| F:M (donor:recipient)                                 | 0.7885                    |
| ABO match                                             | 0.4053                    |
| Myeloablative                                         | 0.7243                    |
| Serotherapy                                           | -0.2899                   |
| Age                                                   | 0.6145                    |
| Total Body Irradiation                                | -0.2387                   |
| Days Post-BMT                                         | -0.4817                   |
| Classifier offset                                     | -1.7154                   |



**Supplementary Table 8. Exploratory Mixed effect modeling of cellular and plasma chronic GVHD diagnostic biomarkers (present at the onset of chronic GVHD) by type of chronic GVHD compared to all control individuals without chronic GVHD.** All three criteria to be a biologically relevant potential diagnostic biomarker had to be met, including: (1) an effect ratio  $\geq 1.3$  or  $\leq 0.75$ , meaning the mean percentage in the chronic GVHD group had to either 30% greater or 30% lower ( $1.0 / 1.3 = \leq 0.75$ ) compared to the mean value of the control group; (2) the area under the curve (AUC) on the receiver operator curve had to be  $\geq 0.60$ ; and (3)  $p < 0.05$ . None of the markers met the p-value criteria for Bonferroni correction. AUC, Area Under Curve; NK<sub>REG</sub>, Regulatory NK cell; RTE, Recent Thymic Emigrants (CD4<sup>+</sup>CD45RA<sup>+</sup>CD31<sup>+</sup>); Th, Helper T cell (CD4<sup>+</sup>); T<sub>REG</sub>, Regulatory T cell (CD4<sup>+</sup>CD127<sup>LOW</sup>CD25<sup>+</sup>).

| Diagnostic Biomarker                                                                               | Pulmonary Phenotype (n=12)     |                                              | De Novo cGVHD (n=7)            |                                              | Progressive cGVHD (n=18)       |                                               |
|----------------------------------------------------------------------------------------------------|--------------------------------|----------------------------------------------|--------------------------------|----------------------------------------------|--------------------------------|-----------------------------------------------|
|                                                                                                    | Relationship cGVHD to Controls | Mean Values (Effect Ratio) P-Value (AUC)     | Relationship cGVHD to Controls | Mean Values (Effect Ratio) P-Value (AUC)     | Relationship cGVHD to Controls | Mean Values (Effect Ratio) P-Value (AUC)      |
| <b>Cellular</b>                                                                                    |                                |                                              |                                |                                              |                                |                                               |
| CD19 B cells (% of total lymphocytes)                                                              | Not Significant                | 18.2% vs 25% (ER: 0.73) p=0.99 (AUC: 0.51)   | Not Significant                | 28.7% vs 22.0% (ER: 1.3) p=0.19 (AUC: 0.62)  | Decreased                      | 14.6% vs 29.2% (ER: 0.50) p=0.01 (AUC: 0.74)  |
| CD19+CD38 <sup>Low</sup> CD10- (% of CD19 B cells) (Transitional T3 B Cell)                        | Not Significant                | 36.7% vs 42.8% (ER: 0.86) p=0.82 (AUC: 0.51) | Not Significant                | 46.6% vs 40% (ER: 1.16) p=0.31 (AUC: 0.67)   | Decreased                      | 29.4% vs 49.6% (ER: 0.59) p=0.005 (AUC: 0.78) |
| CD19+IgD+CD27- (% of CD19 B cells) (Mature naïve B cells)                                          | Not Significant                | 72.7% vs 79.8% (ER: 0.91) p=0.57 (AUC: 0.55) | Not Significant                | 79.9% vs 77.4% (ER: 1.03) p=0.86 (AUC: 0.50) | Decreased                      | 61.8% vs 89.3% (ER: 0.69) p=0.004 (AUC: 0.74) |
| NK T Cells (% of total lymphocytes)                                                                | Decreased                      | 1.2% vs 1.9% (ER: 0.65) p=0.04 (AUC: 0.73)   | Not Significant                | 1.2% vs 1.8% (ER: 0.65) p=0.94 (AUC: 0.54)   | Not Significant                | 1.4% vs 1.9% (ER: 0.76) p=0.19 (AUC: 0.64)    |
| CD56 <sup>Dim</sup> CD69+ (% of NK cells) (Activated CD56 <sup>Dim</sup> Cytolytic NK cells)       | Not Significant                | 29.1% vs 20% (ER: 1.44) p=0.07 (AUC: 0.66)   | Not Significant                | 21.4% vs 23% (ER: 0.94) p=0.53 (AUC: 0.56)   | Increased                      | 29.5% vs 18% (ER: 1.64) p=0.01 (AUC: 0.73)    |
| CD56 <sup>Bright</sup> CD69+ (% of NK cells) (Activated Cytolytic CD56 <sup>bright</sup> NK cells) | Decreased                      | 1.3% vs 2.2% (ER: 0.60) p=0.01 (AUC: 0.77)   | Decreased                      | 0.9% vs 2.2% (ER: 0.39) p=0.007 (AUC: 0.86)  | Not Significant                | 2.6% vs 1.5% (ER: 1.7) p=0.15 (AUC: 0.64)     |
| CD56 <sup>Bright</sup> Perforin <sup>High</sup> (% of NK cells)                                    | Not Significant                | 1.5% vs 1.6%                                 | Decreased                      | 0.8% vs 1.8% (ER: 0.43)                      | Not Significant                | 1.9% vs 1.4% (ER: 1.4)                        |

|                                                                                                                     |                 |                                                     |                 |                                                      |                 |                                                       |
|---------------------------------------------------------------------------------------------------------------------|-----------------|-----------------------------------------------------|-----------------|------------------------------------------------------|-----------------|-------------------------------------------------------|
| (CD56 <sup>Bright</sup> Cytolytic NK cells)                                                                         |                 | (ER: 0.91)<br>p=0.53<br>(AUC: 0.61)                 |                 | p=0.03<br>(AUC: 0.79)                                |                 | p=0.17<br>(AUC: 0.64)                                 |
| CD56 <sup>Bright</sup> Granzyme B <sup>High</sup><br>(% of NK cells)<br>(CD56 <sup>Bright</sup> Cytolytic NK cells) | Not Significant | 8.7% vs 8.1%<br>(ER: 1.08)<br>p=0.42<br>(AUC: 0.62) | Decreased       | 5.9% vs 8.7%<br>(ER: 0.68)<br>p=0.03<br>(AUC: 0.79)  | Not Significant | 9.5% vs 7.3%<br>(ER: 1.3)<br>p=0.68<br>(AUC: 0.53)    |
| CD4+CD45RA+CCR7+<br>(% of CD4 T cells)<br>(Naïve helper T cells)                                                    | Not Significant | 5% vs 12.1%<br>(ER: 0.42)<br>p=0.34<br>(AUC: 0.62)  | Not Significant | 11.5% vs 9.8%<br>(ER: 1.17)<br>p=0.53<br>(AUC: 0.61) | Decreased       | 5.5% vs 13.4%<br>(ER: 0.41)<br>p=0.02<br>(AUC: 0.72)  |
| CD4+CD45RA-PD1+<br>(% of CD4 T cells)<br>(PD1+ memory helper T cells)                                               | Not Significant | 51% vs 34%<br>(ER: 1.50)<br>p=0.13<br>(AUC: 0.65)   | Increased       | 50.5% vs 36%<br>(ER: 1.40)<br>p=0.01<br>(AUC: 0.79)  | Not Significant | 37.1% vs 39.4%<br>(ER: 0.94)<br>p=0.30<br>(AUC: 0.61) |
| <b>Plasma</b>                                                                                                       |                 |                                                     |                 |                                                      |                 |                                                       |
| ICAM-1<br>(ng/mL)                                                                                                   | Increased       | 1039 vs 532<br>(ER: 1.95)<br>p=0.005<br>(AUC: 0.76) | Not Significant | 579 vs 682<br>(ER: 0.85)<br>p=0.75<br>(AUC: 0.51)    | Not Significant | 775 vs 583<br>(ER: 1.33)<br>p=0.054<br>(AUC: 0.66)    |

**A**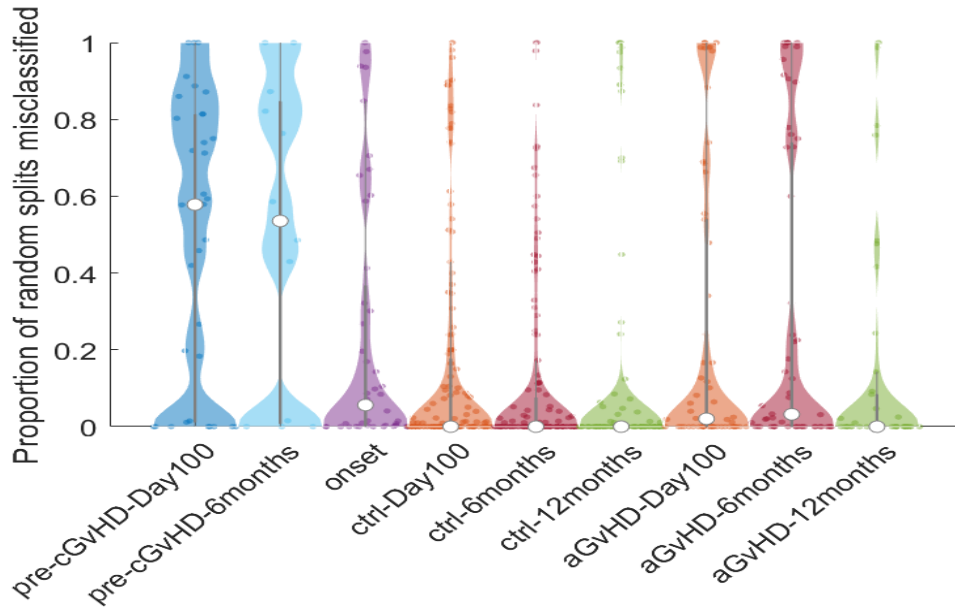**B**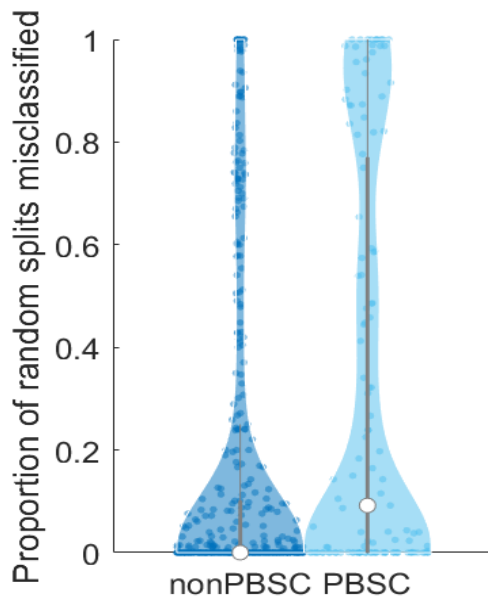**C**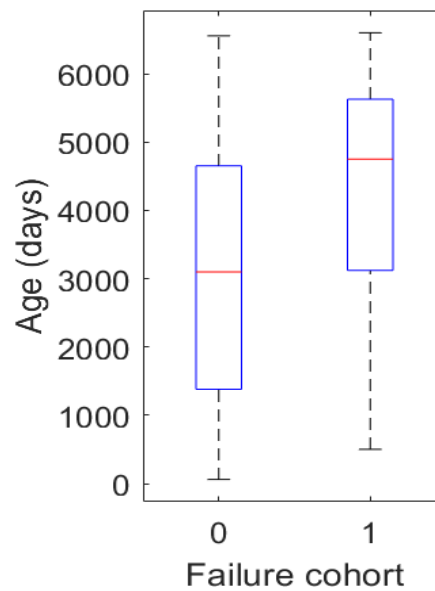

**Supplementary Figure 1. Failure cohort not captured by the classifier.** For different random train-test sample splits, different samples would be misclassified. We divided the samples based on the proportion of random splits for which they were misclassified, with 0.8 as the threshold to define the failure cohort. (A) The proportion of random splits misclassified for each sample is represented by a dot within the violin plots. The white circle is the median. A key observation (as would be expected) is that samples from cGvHD subjects prior to their onset of cGVHD (samples drawn at day 100 +/- 14 days and 6-months +/- 1 month) were more often misclassified. (B) Peripheral blood stem cell grafts (PBSC) compared to non-PBSC grafts have a higher proportion of random splits misclassified. (C) The failure cohort (denoted as “1”) is on average older.
